# Supplementary material
Source: bioRxiv or medRxiv preprint supplement (https://medrxiv.org/highwire/filestream/86529/field_highwire_adjunct_files/0/2020.04.09.20058651-1.pdf)
Supplement: Supplementary file [file 2020.04.09.20058651-1.pdf]

## Supplementary figures

### **Scaling diagnostics in times of COVID-19: Colorimetric Loop-mediated Isothermal Amplification (LAMP) assisted by a 3D-printed incubator for cost-effective and scalable detection of SARS-CoV-2**

Everardo González-González<sup>1,2</sup>, Itzel Montserrat Lara-Mayorga<sup>1,3</sup>, Iram Pablo Rodríguez-Sánchez<sup>4,5</sup>, Felipe Yee-de León<sup>6</sup>, Andrés García-Rubio<sup>1,3</sup>, Carlos Ezio Garciaméndez-Mijares<sup>1,3,7</sup>, Gilberto Emilio Guerra-Alvarez<sup>1,3</sup>, Germán García-Martínez<sup>1,3,7</sup>, Juan Andrés Aguayo-Hernández<sup>1,3</sup>, Eduardo Márquez-García<sup>8</sup>, Yu Shrike Zhang<sup>7</sup>, Sergio O. Martínez-Chapa<sup>3</sup>, Joaquín Zúñiga<sup>9,10</sup>, Grissel Trujillo-de Santiago<sup>1,3,\*</sup>, Mario Moisés Alvarez<sup>1,2\*</sup>

<sup>1</sup> Centro de Biotecnología-FEMSA, Tecnológico de Monterrey, CP 64849, Monterrey, NL, México

<sup>2</sup> Departamento de Bioingeniería, Tecnológico de Monterrey, CP 64849, Monterrey, NL, México

<sup>3</sup> Departamento de Ingeniería Mecatrónica y Eléctrica, Tecnológico de Monterrey, CP 64849, Monterrey, NL, México

<sup>4</sup> Universidad Autónoma de Nuevo León, Facultad de Ciencias Biológicas, Laboratorio de Fisiología Molecular y Estructural. 66455, San Nicolás de los Garza, NL, México.

<sup>5</sup> Alfa Medical Center, Guadalupe, CP 67100, NL, México.

<sup>6</sup> Delee Corp. Mountain View 94041, CA, USA

<sup>7</sup> Division of Engineering in Medicine, Department of Medicine, Brigham and Women's Hospital, Harvard Medical School, Cambridge 02139, MA, USA

<sup>8</sup> Laboratorio de Inmunobiología y Genética, Instituto Nacional de Enfermedades Respiratorias Ismael Cosío Villegas, Cd. de México, México.

<sup>9</sup> Unidad de Biología Molecular, Instituto Nacional de Enfermedades Respiratorias Ismael Cosío Villegas, Cd. de México, México.

<sup>10</sup> Escuela de Medicina y Ciencias de la Salud, Tecnológico de Monterrey, CP 14380, Cd. de México, México

\*Corresponding authors. E-mails: [mario.alvarez@tec.mx](mailto:mario.alvarez@tec.mx); [grissel@tec.mx](mailto:grissel@tec.mx);

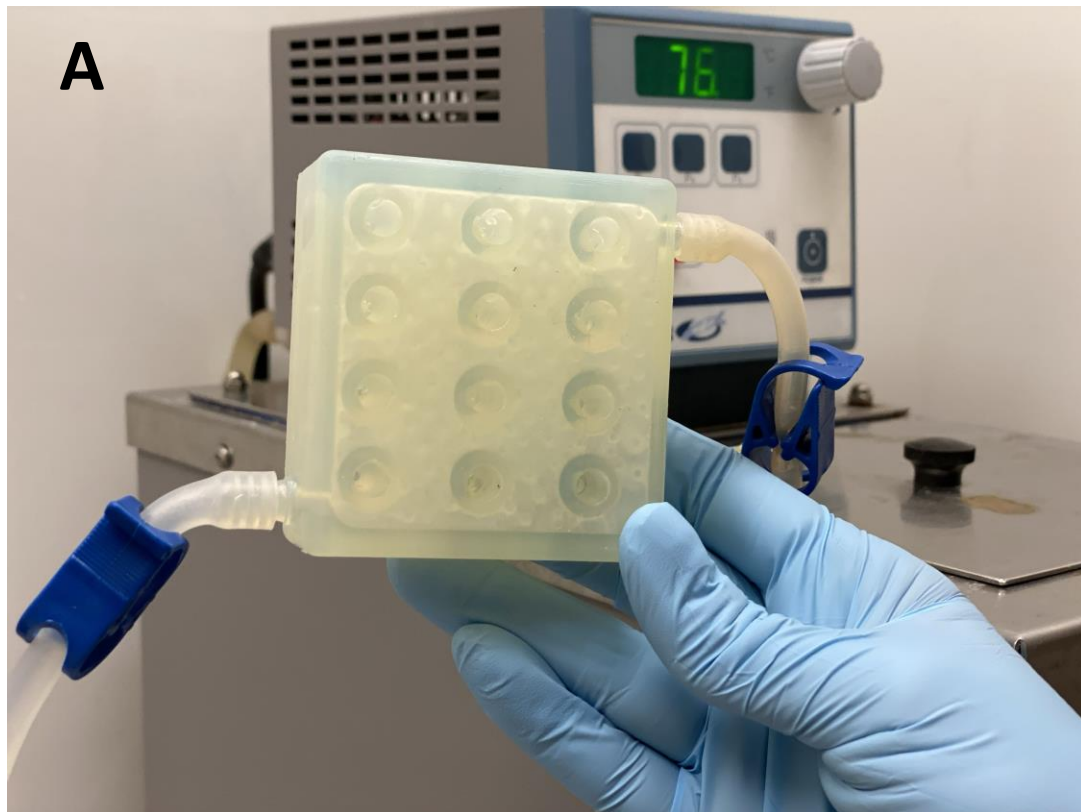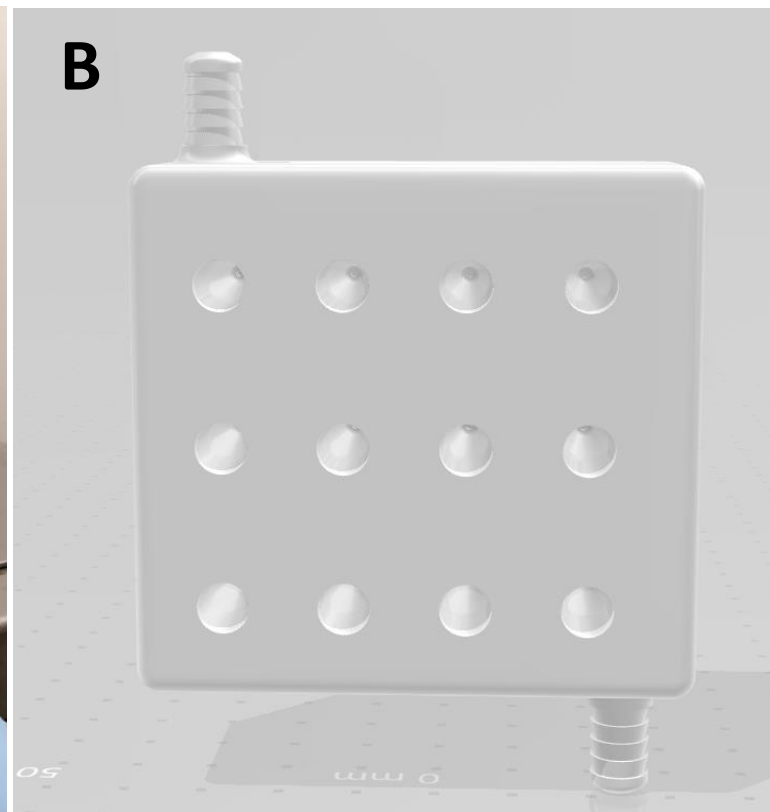

**Supplementary Figure 1**

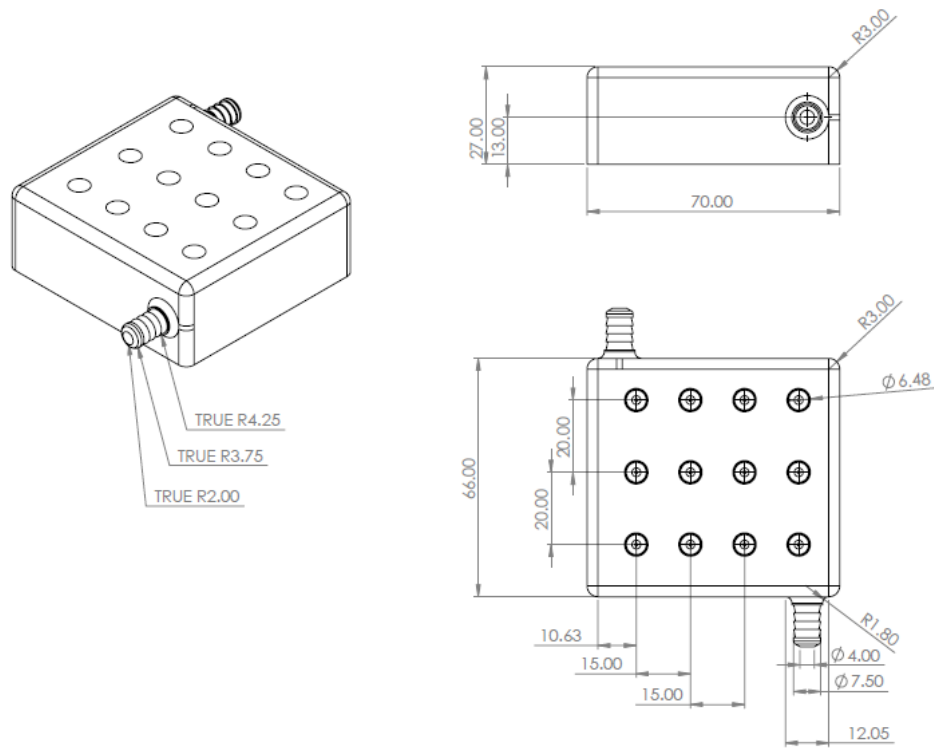

**Supplementary Figure 2**

# Positive Control: 2019-nCoV\_N

Created with SnapGene®

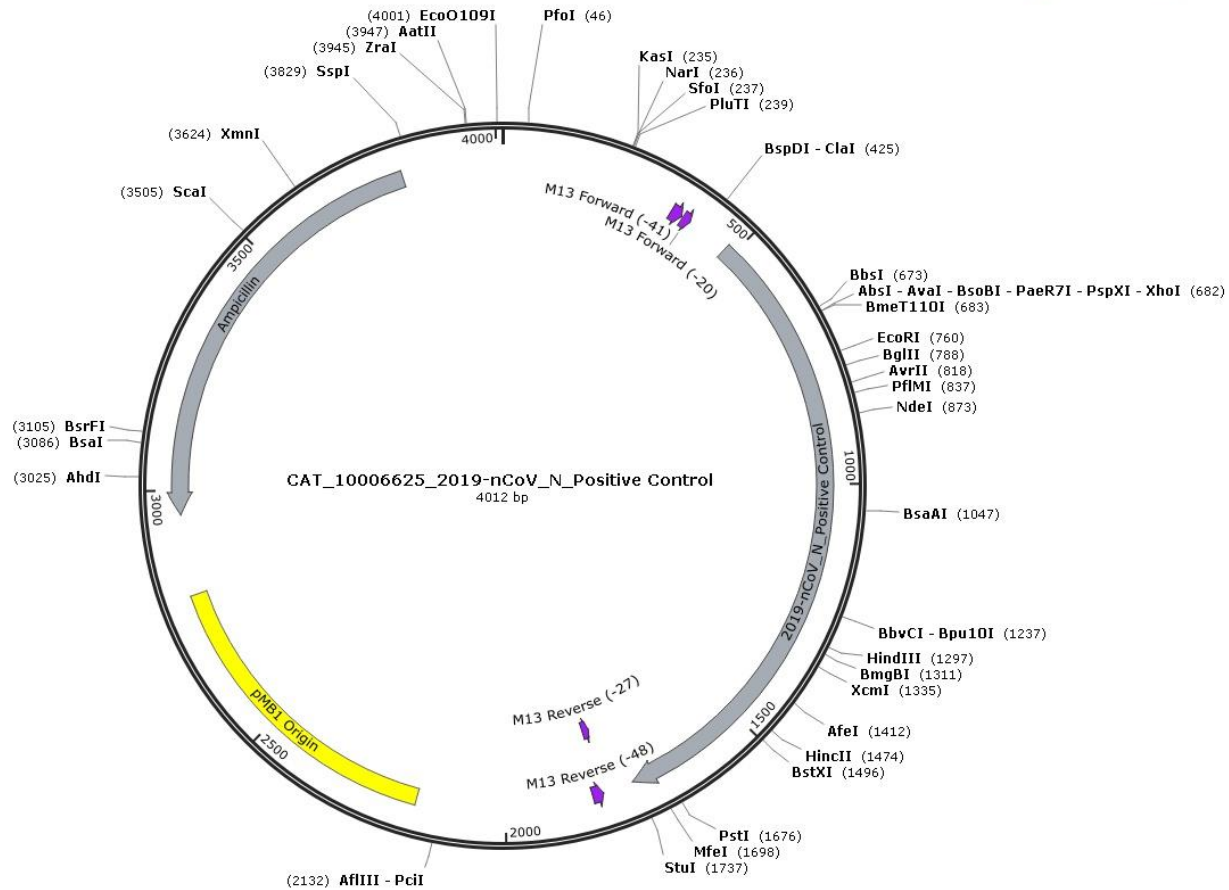

Supplementary Figure 3

# Negative Control: GP EBOV

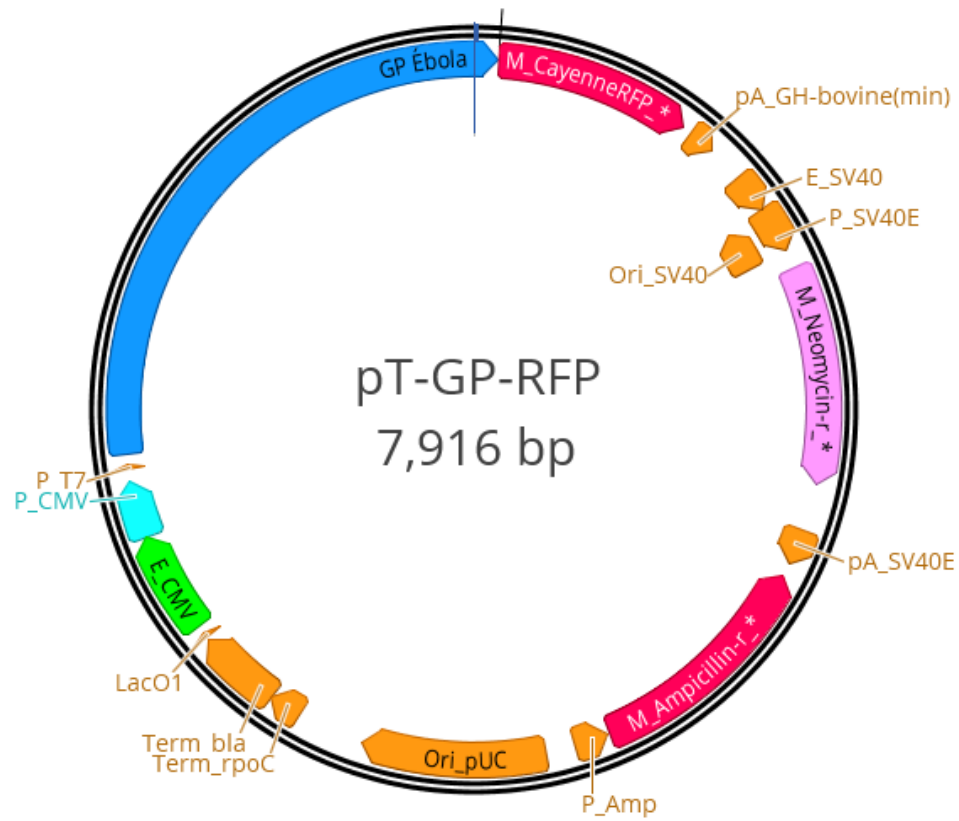

Supplementary Figure 4

**A**Set  $\alpha$ Set  $\beta$ 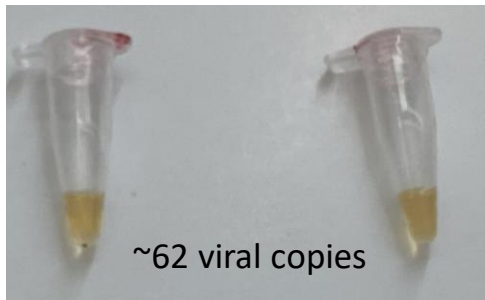**B**

Storage temperature

4 °C

20 °C

Storage time (days)

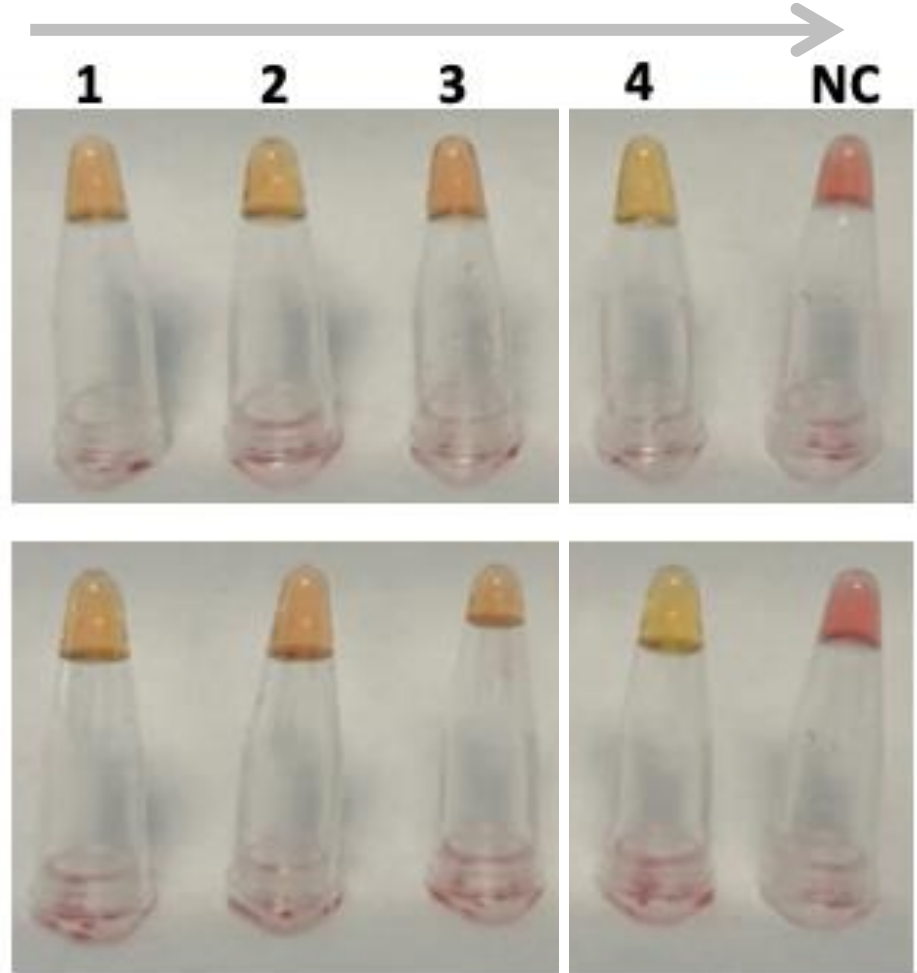

Supplementary Figure 5

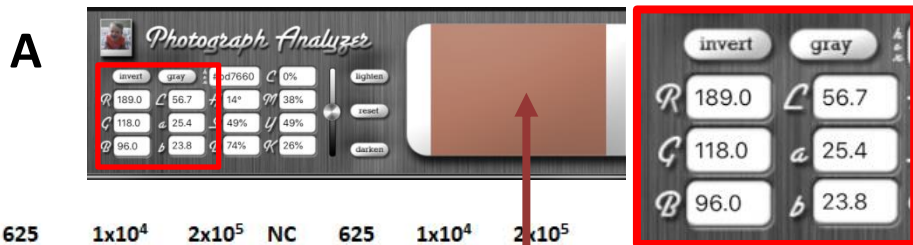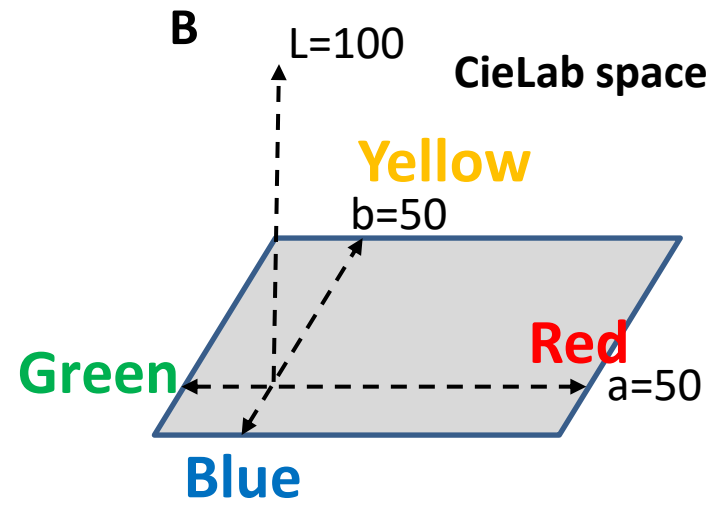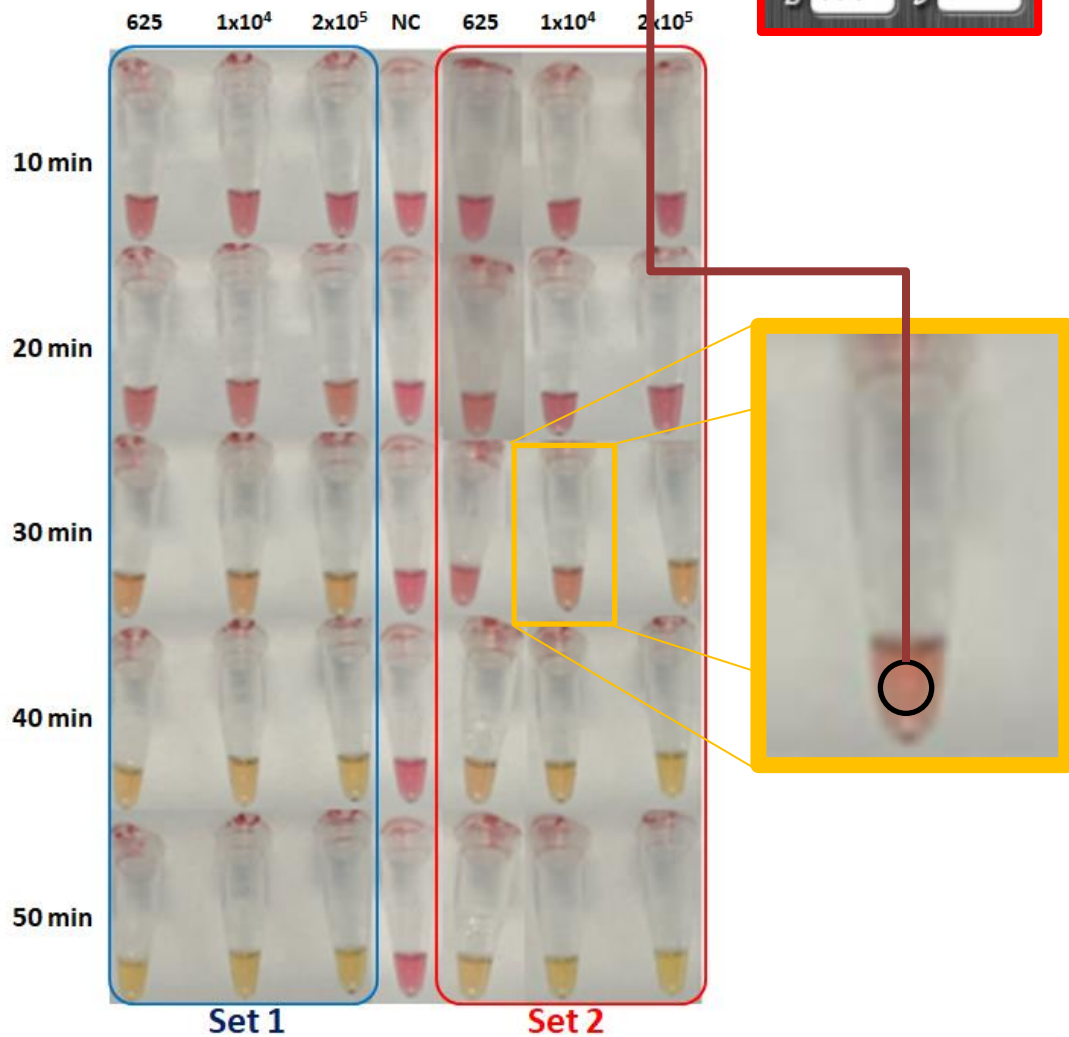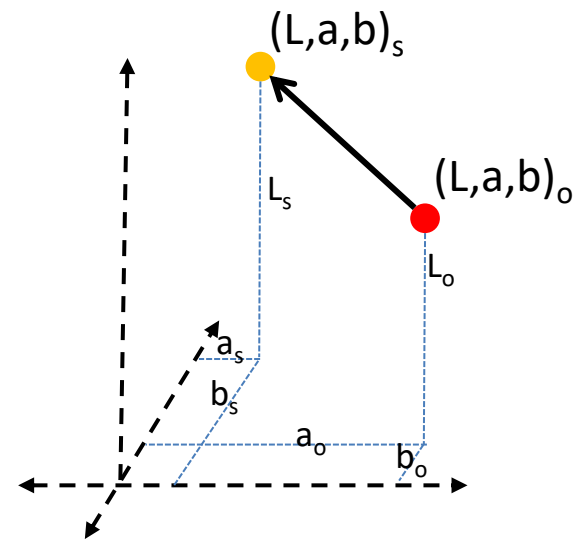

Supplementary Figure 6

**A**

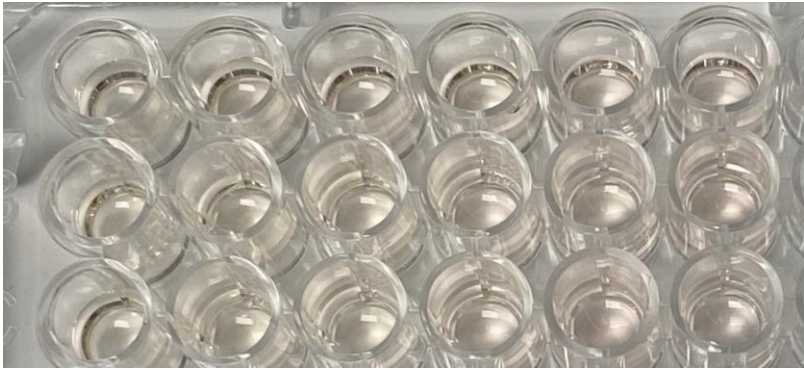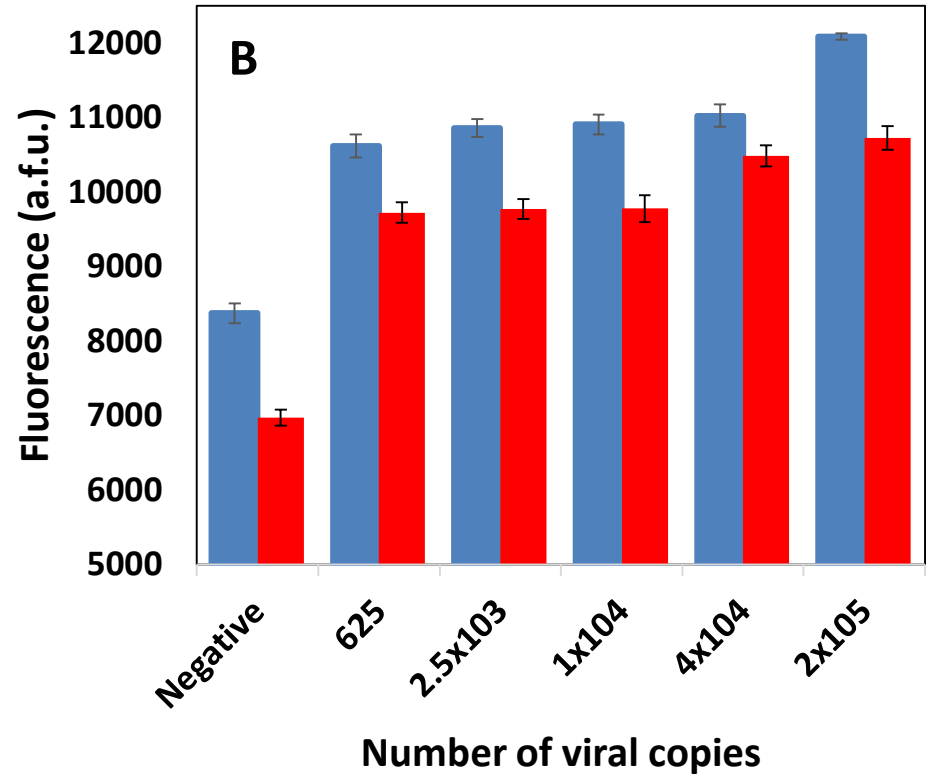

**Supplementary Figure 7**



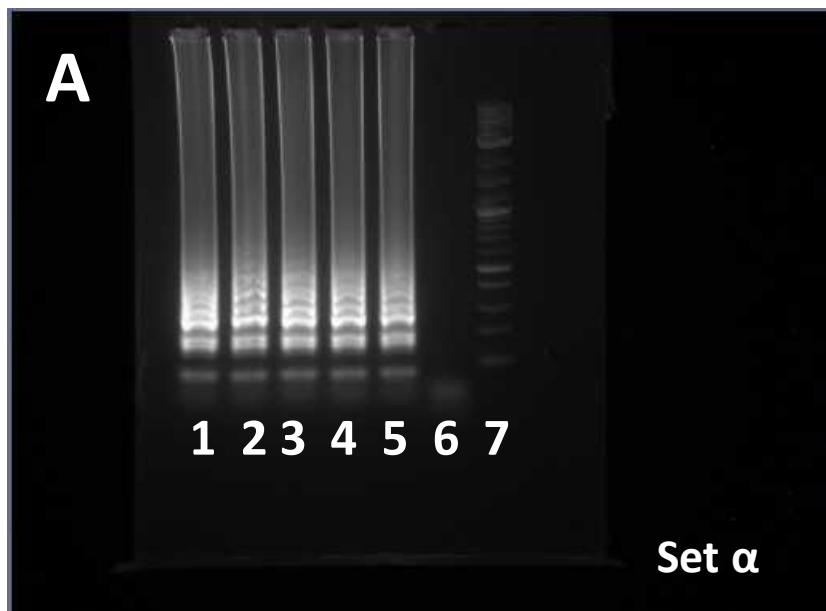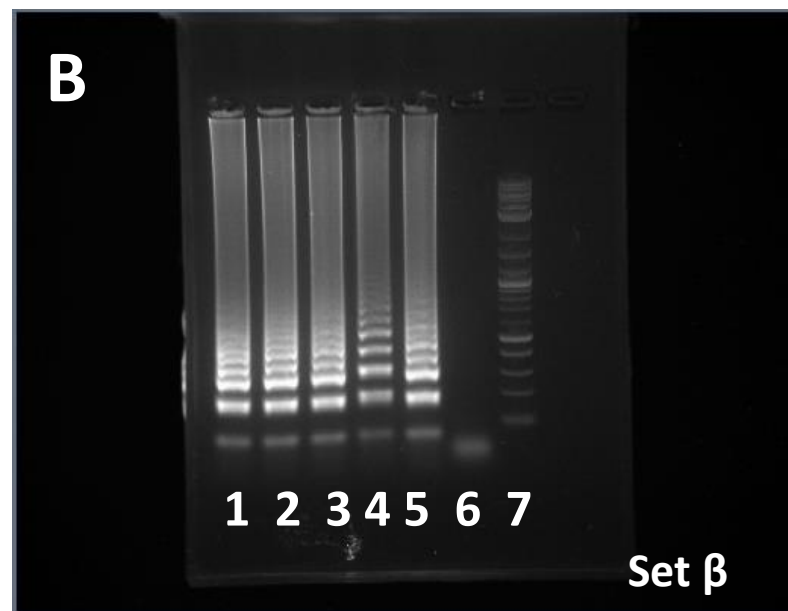

Supplementary Figure 8

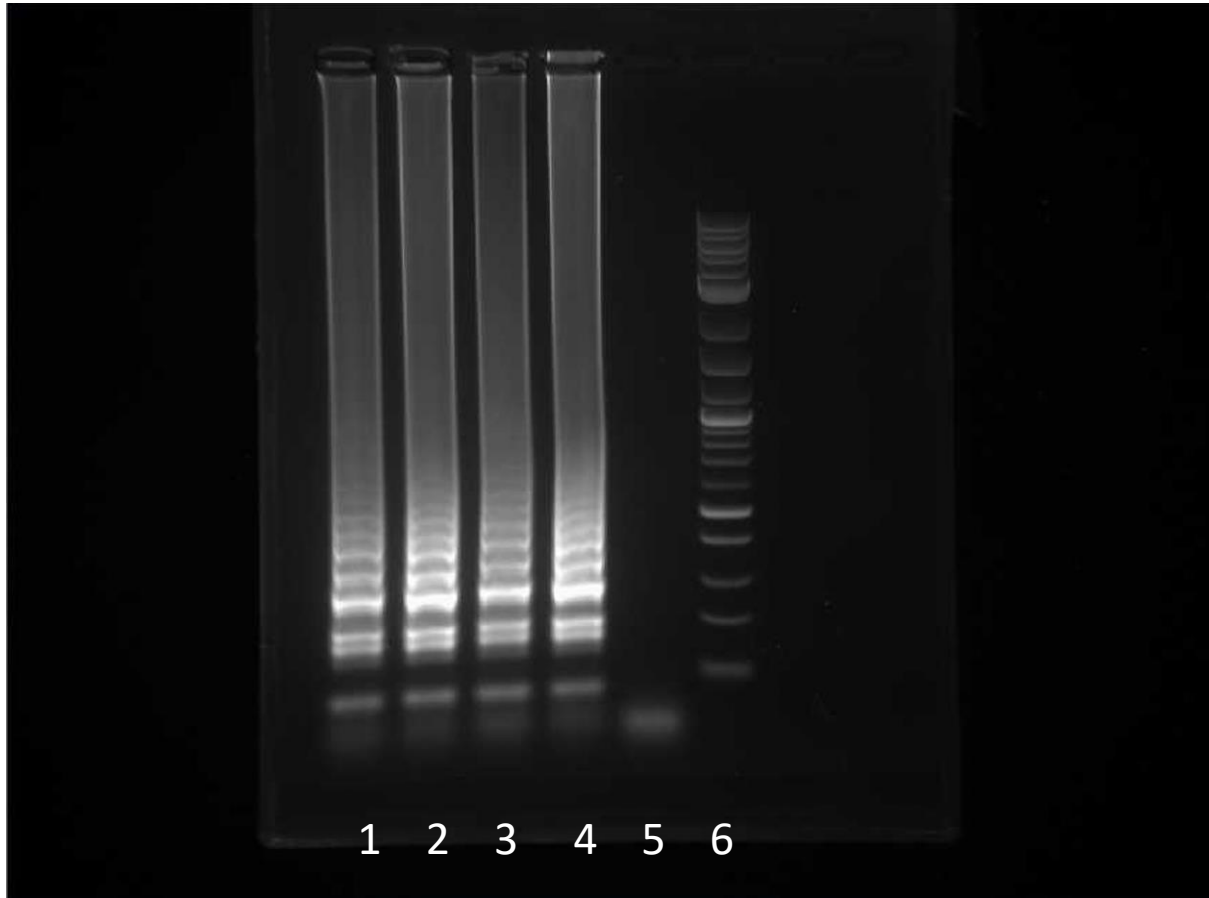

**Supplementary Figure 8**

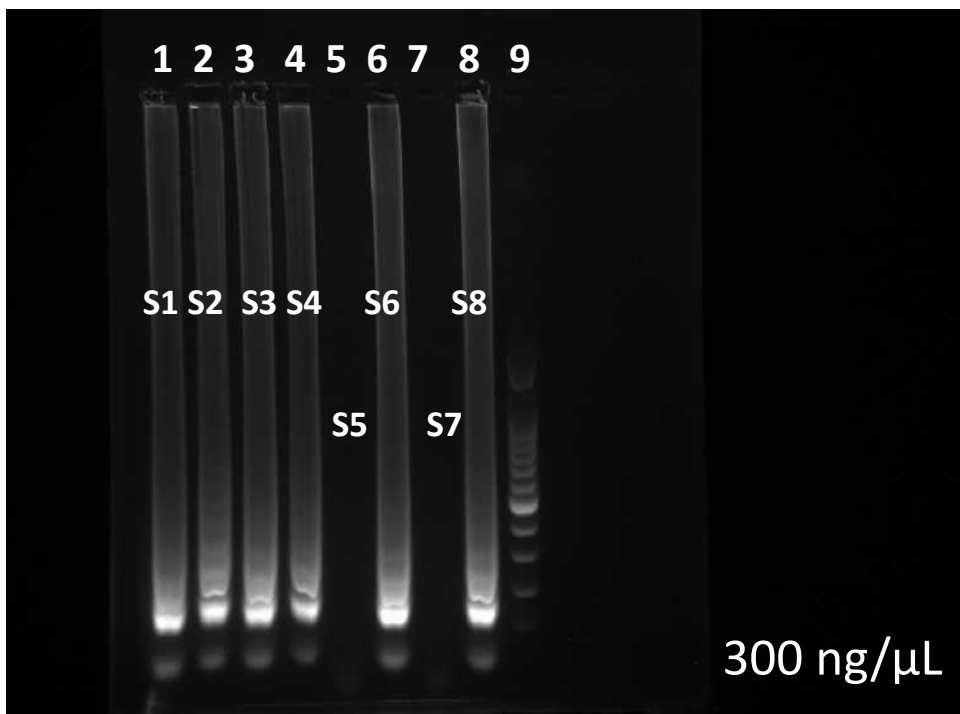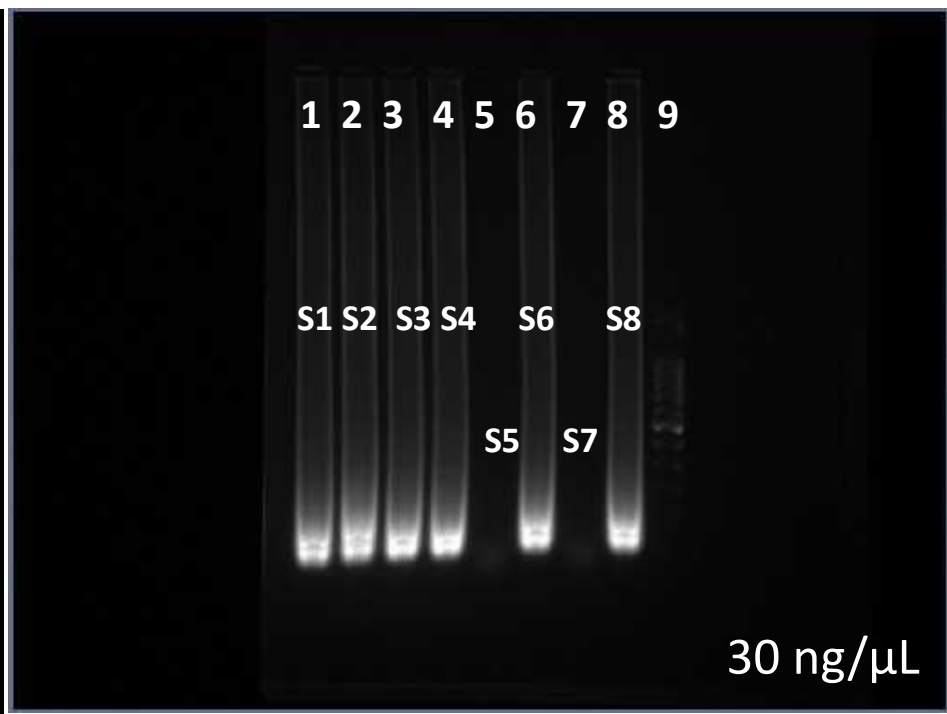

Supplementary Figure 10
